# Supplementary material for: Drosophila GAGA factor polyglutamine domains exhibit prion-like behavior
Source: PubMed Central journal article supplement (PMC3701498; doi:10.1186/1471-2164-14-374), 2013-06-03

**Supplementary Figure 1.**

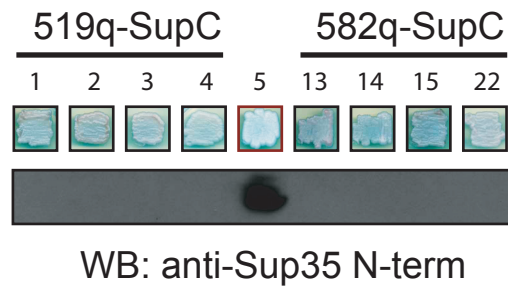

Supplement: 1471-2164-14-374-S1.pdf [file 1471-2164-14-374-S1.pdf]
