# Supplementary material for: Drosophila GAGA factor polyglutamine domains exhibit prion-like behavior
Source: PubMed Central journal article supplement (PMC3701498; doi:10.1186/1471-2164-14-374), 2013-06-03
Supplement: 1471-2164-14-374-S3.pdf [file 1471-2164-14-374-S3.pdf]

**Supplementary Table 1. Strains of *S. cerevisiae* used in this study.**

| Strain                          | Genotype                                                                                 | reference  |
|---------------------------------|------------------------------------------------------------------------------------------|------------|
| <b>OT60 ([psi]-74-D694)</b>     | MATa ade1-14 his3 leu2 trp1 ura3 [psi PIN+]                                              | (1)        |
| <b>OT55 ([PSI+]1-1-74-D694)</b> | MATa ade1-14 his3 leu2 trp1 ura3 [PSI+ PIN+] weak [PSI+] derivative of OT60              | (1)        |
| <b>OT56 ([PSI+]7-1-74-D694)</b> | MATa ade1-14 his3 leu2 trp1 ura3 [PSI+ PIN+] strong [PSI+] derivative of OT60            | (1)        |
| <b>GT17 ([psi- pin-])</b>       | MATa ade1-14 his3 leu2 trp1 ura3 [psi pin]                                               | (2)        |
| <b>GT81</b>                     | MATa/α ade1-14 his3-Δ200(or 11, 15) leu2.3, 112 trp1-Δ ura3-52 lys2                      | (3)        |
| <b>Y133</b>                     | MATa/α ade1-14 his3-Δ200(or 11, 15) leu2.3, 112 trp1-Δ ura3-52 lys2 sup35::kanmx; Δsup35 | This study |

1. Derkatch IL, Chernoff YO, Kushnirov VV, Inge-Vechtomov SG, Liebman SW (1996) Genesis and variability of [PSI] prion factors in *Saccharomyces cerevisiae*. *Genetics* 144: 1375-1386.
2. Derkatch IL, Bradley ME, Zhou P, Chernoff YO, Liebman SW (1997) Genetic and environmental factors affecting the de novo appearance of the [PSI+] prion in *Saccharomyces cerevisiae*. *Genetics* 147: 507-519.
3. Chernoff YO, *et al.* (2000) Evolutionary conservation of prion-forming abilities of the yeast Sup35 protein. *Mol Microbiol* 35: 865-876.
